# Supplementary material for: Hydrogen-Bonding-Aided Fabrication of Wood Derived Cellulose Scaffold/Aramid Nanofiber into High-Performance Bulk Material
Source: MDPI journal article supplement (doi:10.3390/ma14185444), 2021-09-20
Supplement: s1 [file s1]

Supplementary Materials

# Hydrogen-Bonding-Aided Fabrication of Wood Derived Cellulose Scaffold/Aramid Nanofiber into High-Performance Bulk Material

Xiaoshuai Han, Weijie Wu, Jingwen Wang, Zhiwei Tian and Shaohua Jiang \*

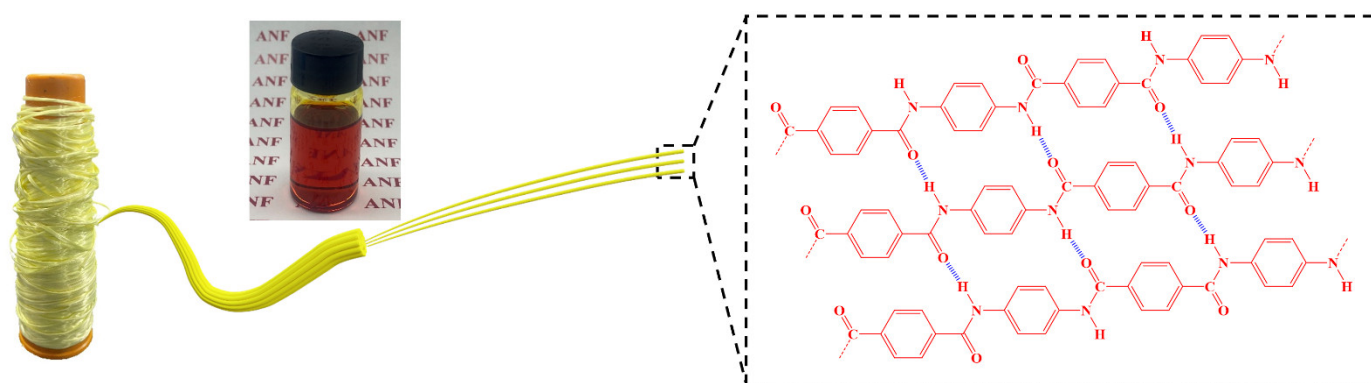

**Figure S1.** The preparation of aramid nanofiber (ANF) and molecular structure of ANF.

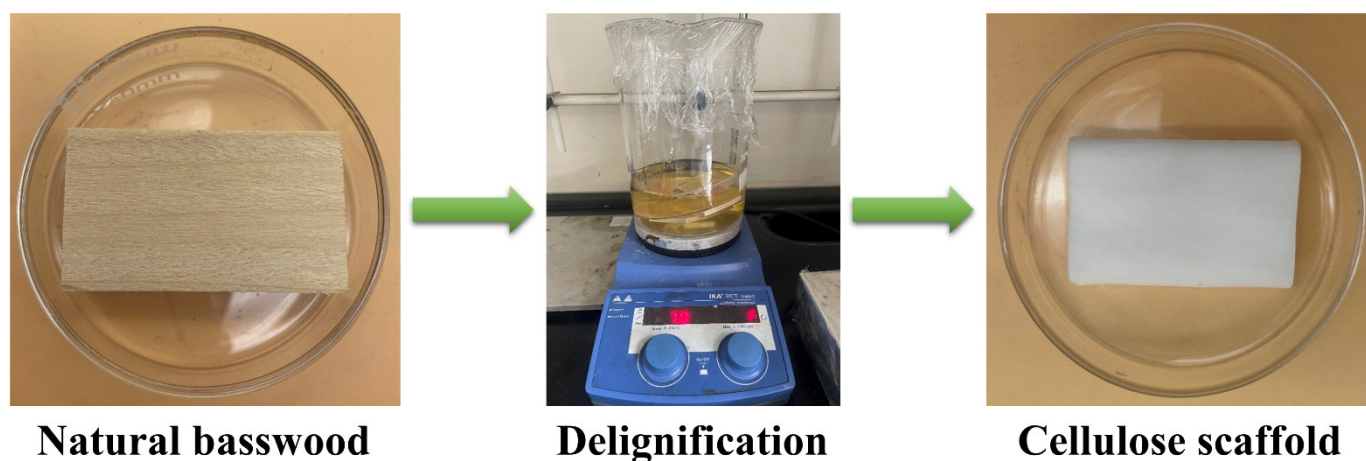

**Figure S2.** Delignification process of natural wood by  $\text{NaClO}_2$  and  $\text{NaOH}$  treatment.

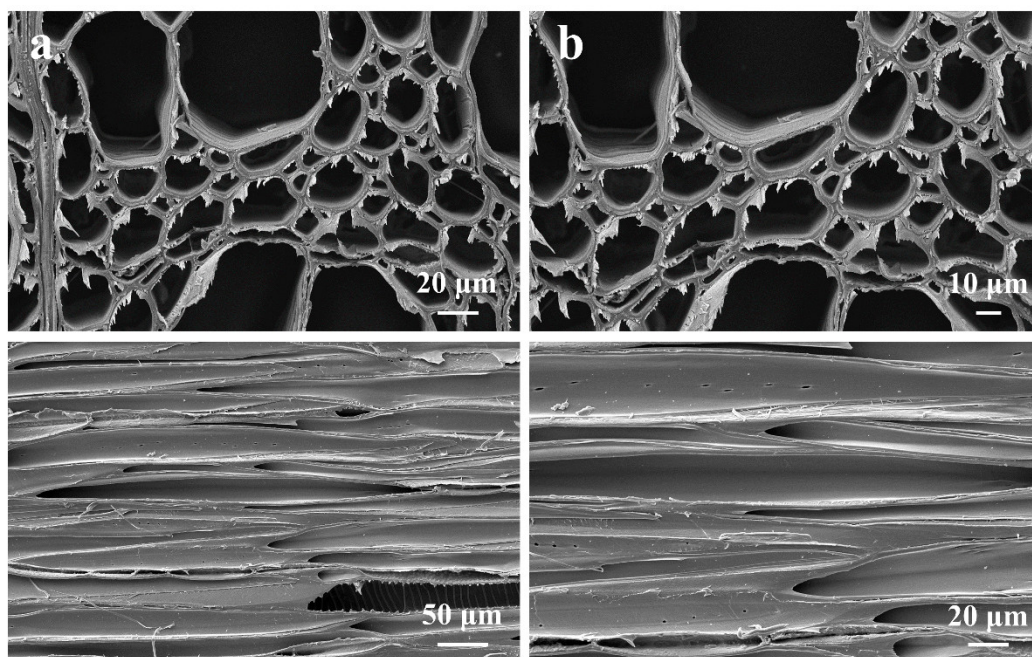

Figure S3. SEM images of NW.

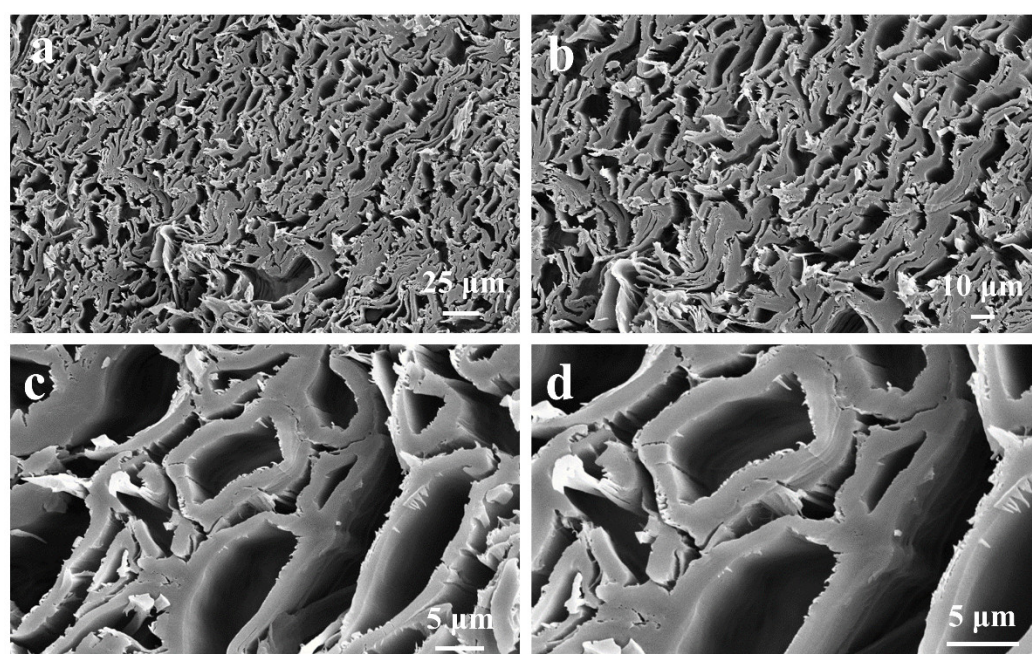

Figure S4. SEM transverse images of CS<sub>AD</sub>.



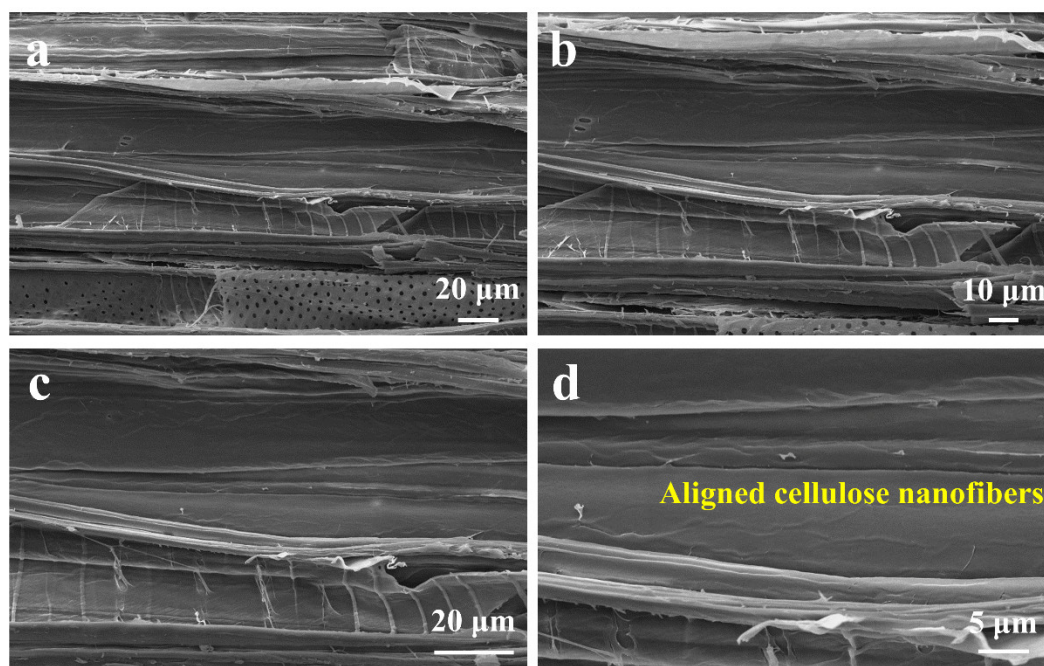

**Figure S5.** SEM longitudinal images of CS<sub>AD</sub>.

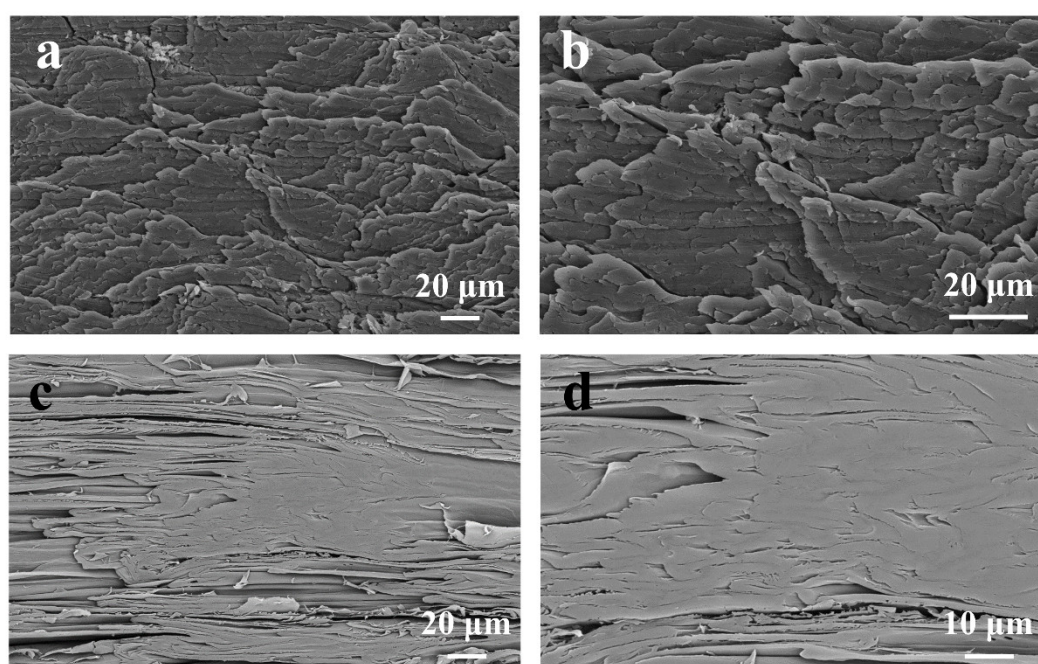

**Figure S6.** SEM transverse images of CCS<sub>AD</sub>-ANF (a, b) and SEM longitudinal images of CCS<sub>AD</sub>-ANF (c, d).

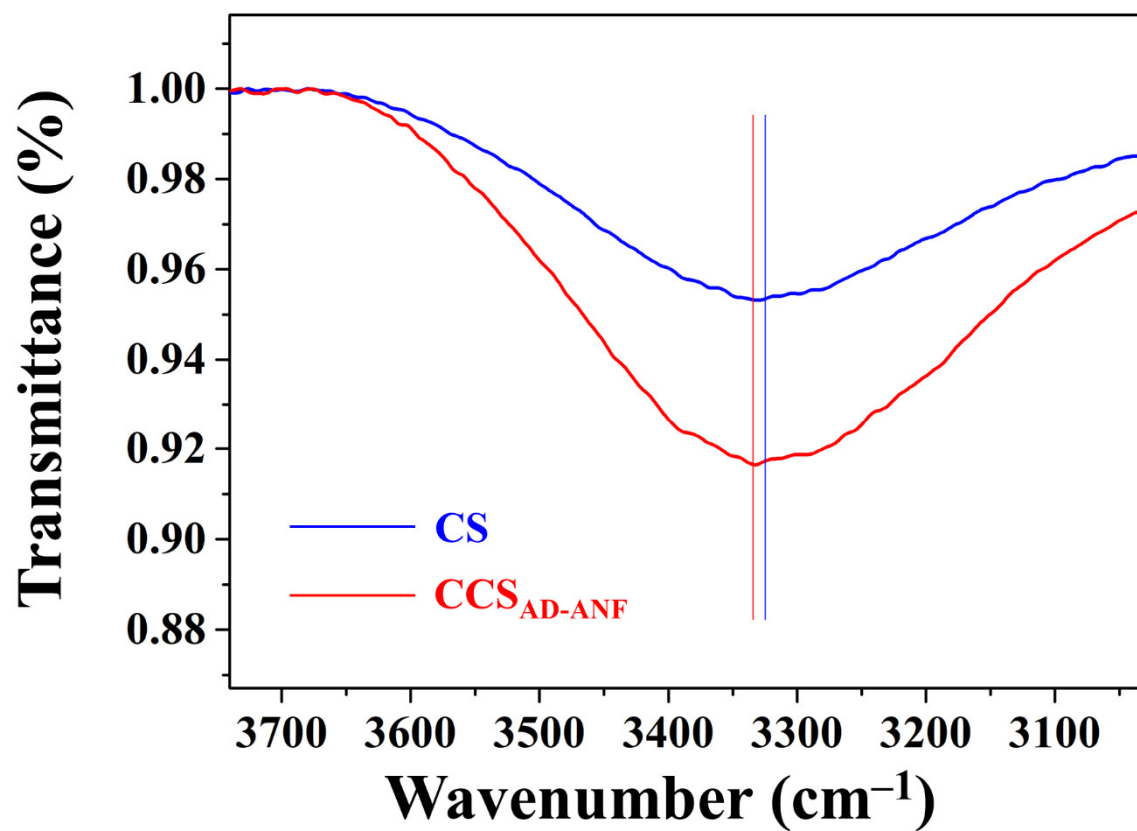

Figure S7. Magnified FTIR spectra for CS and CCSAD-ANF
